# Supplementary material for: Synergetic effect of metal–support for enhanced performance of the Cu–ZnO–ZrO2/UGSO catalyst for CO2hydrogenation to methanol
Source: Royal Society of Chemistry journal article supplement (doi:10.1039/d2cy01317g), 2022-11-21
Supplement: d2cy01317g1.pdf [file d2cy01317g1.pdf]

Supporting information

## **Synergetic effect metal-support for enhanced performance of Cu-ZnO-ZrO<sub>2</sub>/UGSO catalyst for CO<sub>2</sub> hydrogenation to methanol**

Thi Thanh Nguyet Vu<sup>1</sup>, Alex Desgagnés<sup>1</sup>, Pascal Fongarland<sup>2</sup>, Laurent Vanoye<sup>2</sup>, Frédéric Bornette<sup>2</sup>,  
Maria C. Iliuta<sup>1\*</sup>

<sup>1</sup>Université Laval, Département de génie chimique, 1065 avenue de la Médecine, Québec, QC, G1V 0A6, Canada.

<sup>2</sup>CP2M, Catalyse, Polymérisation, Procédés et Matériaux, CNRS, CPE Lyon, Université Claude-Bernard Lyon 1, 43 Boulevard du 11 novembre 1918, 69616 Villeurbanne, France.

Corresponding author ([maria-cornelia.iliuta@gch.ulaval.ca](mailto:maria-cornelia.iliuta@gch.ulaval.ca))

**Table S1.** Reducibility of CZxZr/UGSO catalysts.

**Table S2.** Comparison of catalytic performance of our developed catalysts and some other catalysts in CO<sub>2</sub> hydrogenation into methanol.

**Figure S1.** N<sub>2</sub> adsorption-desorption isotherms (A) and pore size distributions (B) of UGSO and CZxZr/UGSO samples.

**Figure S2.** H<sub>2</sub>-TPR profiles of UGSO and CZxZr/UGSO from 50 to 900 °C.

**Figure S3.** CO<sub>2</sub>-TPD profiles of (A) CZ3Zr/UGSO, (B) CZ6Zr/UGSO, (C) CZ9Zr/UGSO, and (D) CZ12Zr/UGSO.

**Figure S4.** XRD patterns of (A) calcined UGSO, UGSO-H, CZ9Zr/UGSO and CZ9Zr/UGSO-H; (B) reduced CZ9Zr/UGSO and CZ9Zr/UGSO-H.

**Figure S5.** XPS spectra of surface elements in calcined samples (A) Mg 2p, (b) Fe 2p, (C) Cu 2p.

**Table S1.** Reducibility of CZ<sub>x</sub>Zr/UGSO catalysts.

| Sample      | Peak $\alpha$ |        | Peak $\beta$ |        | Peak $\gamma$ |                   |
|-------------|---------------|--------|--------------|--------|---------------|-------------------|
|             | T (°C)        | % Area | T (°C)       | % Area | T (°C)        | % Area            |
| CZ3Zr/UGSO  | 191           | 15.8   | 210          | 34.4   | 236           | 49.8 <sup>1</sup> |
| CZ6Zr/UGSO  | 186           | 22.8   | 204          | 63.0   | 222           | 14.1              |
| CZ9Zr/UGSO  | 178           | 6.3    | 202          | 74.9   | 206           | 18.7              |
| CZ12Zr/UGSO | 187           | 22.0   | 200          | 64.2   | 205           | 13.8              |

<sup>1</sup>calculated based on the total area of  $\gamma$  and  $\lambda$  peaks.

**Table S2.** Comparison of catalytic performance of our developed catalysts and some other catalysts in CO<sub>2</sub> hydrogenation into methanol.

| Catalyst                                            | T (°C) | P (bar) | Conv. (%) | Sel. <sub>MeOH</sub> (%) | Yield <sub>MeOH</sub> (%) | Ref & Year    |
|-----------------------------------------------------|--------|---------|-----------|--------------------------|---------------------------|---------------|
| CZ9Zr/UGSO                                          | 240    | 20      | 4.8       | 31.5                     | <b>1.51</b>               | This work     |
| CZ9Zr/UGSO-H                                        | 240    | 20      | 7.0       | 26.1                     | <b>1.82</b>               | This work     |
| Cu-ZnO-ZrO <sub>2</sub> @Al-TUD-1                   | 240    | 20      | 2.5       | 39.3                     | 0.98                      | <sup>77</sup> |
| Cu-ZnO-ZrO <sub>2</sub> @Al-TUD-1                   | 260    | 20      | 5.9       | 27.5                     | 1.62                      | <sup>77</sup> |
| YBa <sub>2</sub> Cu <sub>3</sub> O <sub>7</sub>     | 240    | 30      | 3.0       | 38.4                     | 1.2                       | <sup>78</sup> |
| Cu/ZnAl <sub>2</sub> O <sub>4</sub>                 | 250    | 20      | 4.0       | 21.0                     | 0.80                      | <sup>79</sup> |
| Cu-In-Zr-O                                          | 250    | 25      | 1.5       | 80.0                     | 1.20                      | <sup>80</sup> |
| Cu-ZrO <sub>2</sub>                                 | 270    | 20      | 2.7       | 41.0                     | 1.10                      | <sup>81</sup> |
| Pd-Ga <sub>2</sub> O <sub>3</sub> /SiO <sub>2</sub> | 250    | 30      | 1.3       | 58.9                     | 0.79                      | <sup>82</sup> |
| Pd-Ca/MCM41                                         | 250    | 41      | 5.0       | 28.0                     | 1.40                      | <sup>83</sup> |
| Pd-K/SBA-15                                         | 250    | 41      | 14.0      | 11.0                     | 1.54                      | <sup>83</sup> |

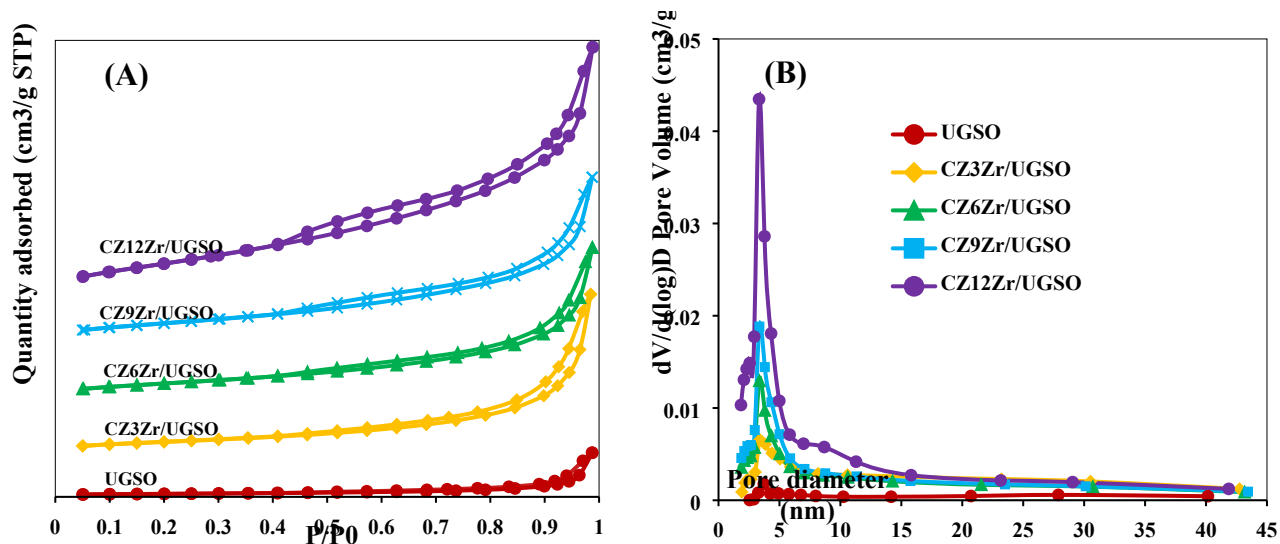

**Figure S1.** N<sub>2</sub> adsorption-desorption isotherms (A) and pore size distributions (B) of UGSO and CZ<sub>x</sub>Zr/UGSO samples.

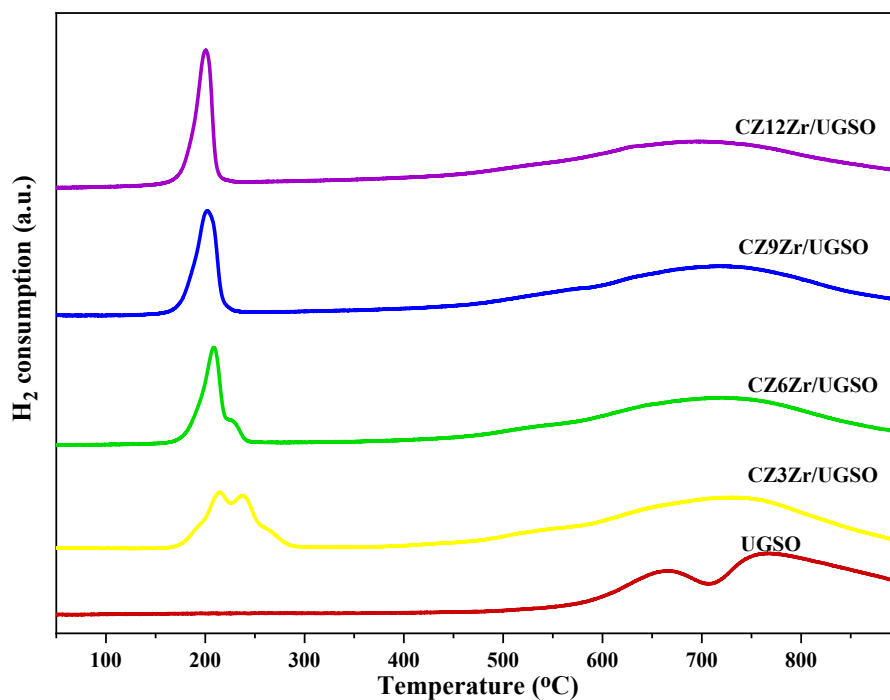

**Figure S2.** H<sub>2</sub>-TPR profiles of UGSO and CZ<sub>x</sub>Zr/UGSO from 50 to 900 °C.

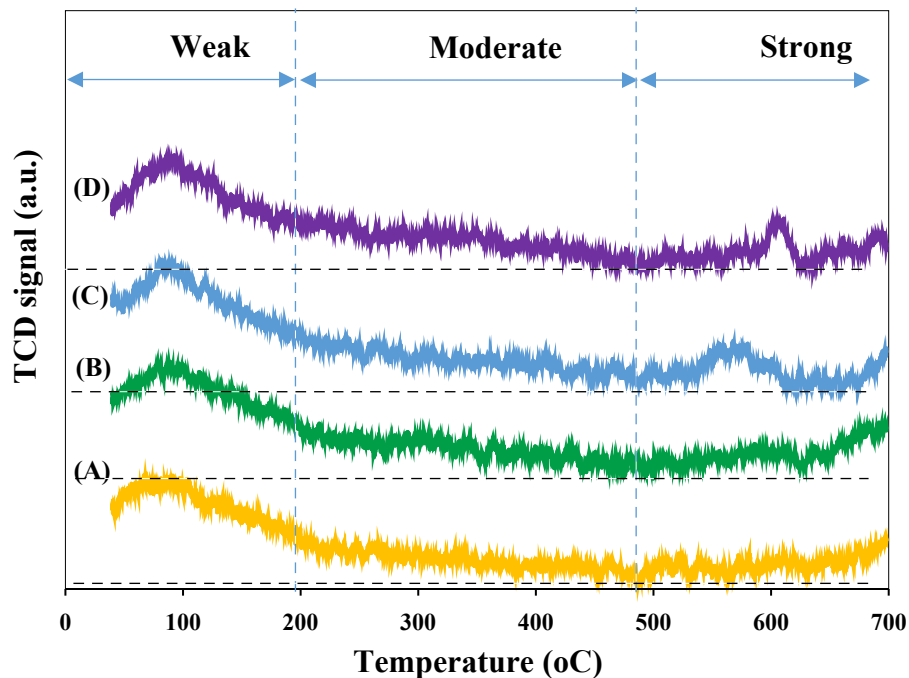

**Figure S3.** CO<sub>2</sub>-TPD profiles of (A) CZ3Zr/UGSO, (B) CZ6Zr/UGSO, (C) CZ9Zr/UGSO, and (D) CZ12Zr/UGSO.

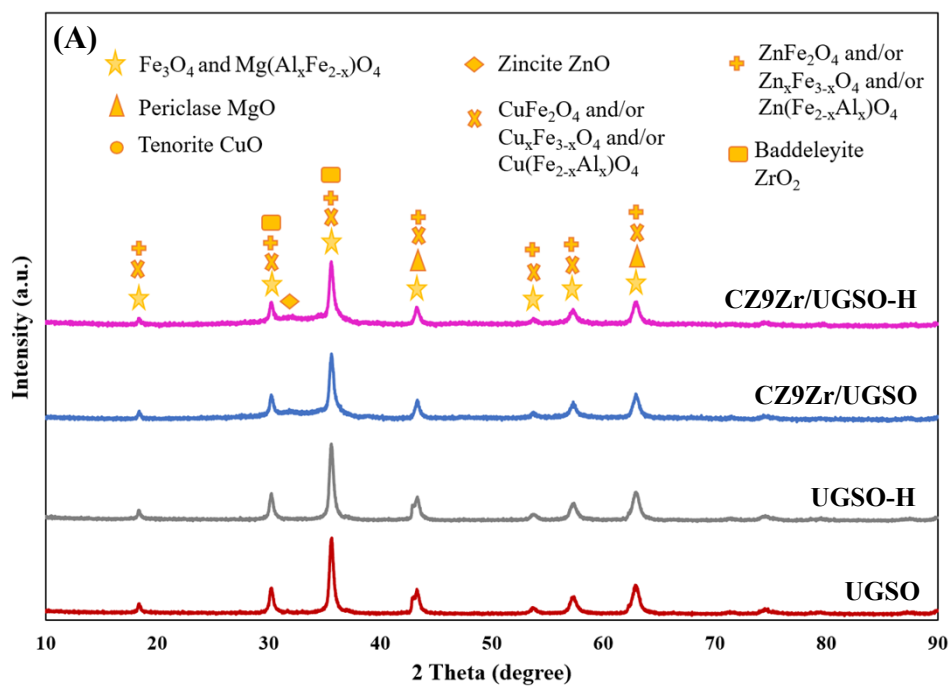

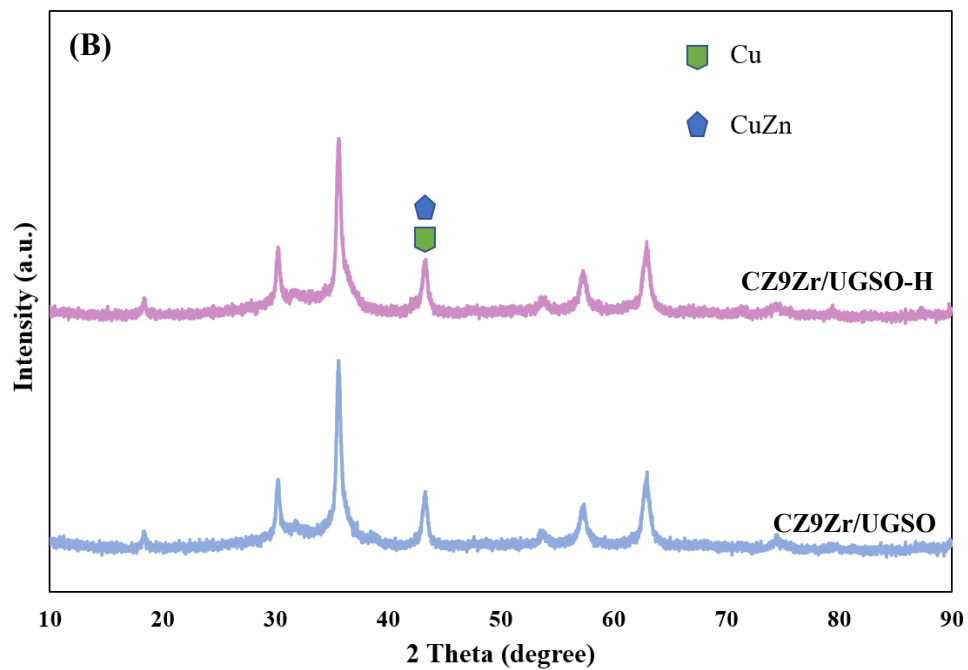

**Figure S4.** XRD patterns of (A) calcined UGSO, UGSO-H, CZ9Zr/UGSO and CZ9Zr/UGSO-H; (B) reduced CZ9Zr/UGSO and CZ9Zr/UGSO-H.

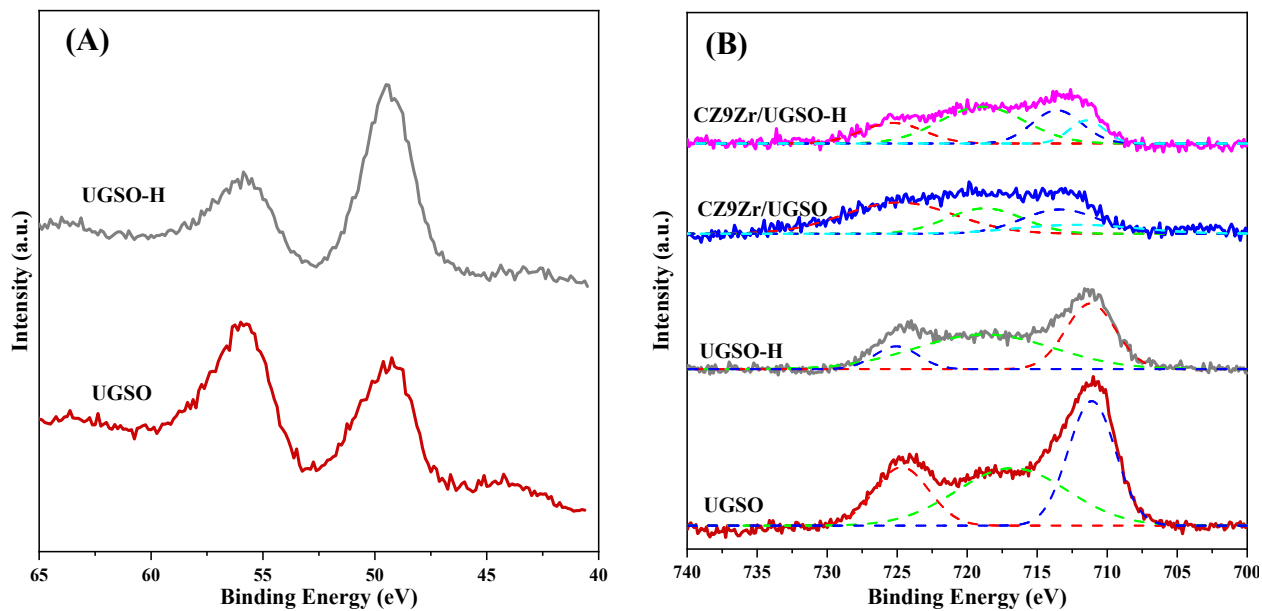

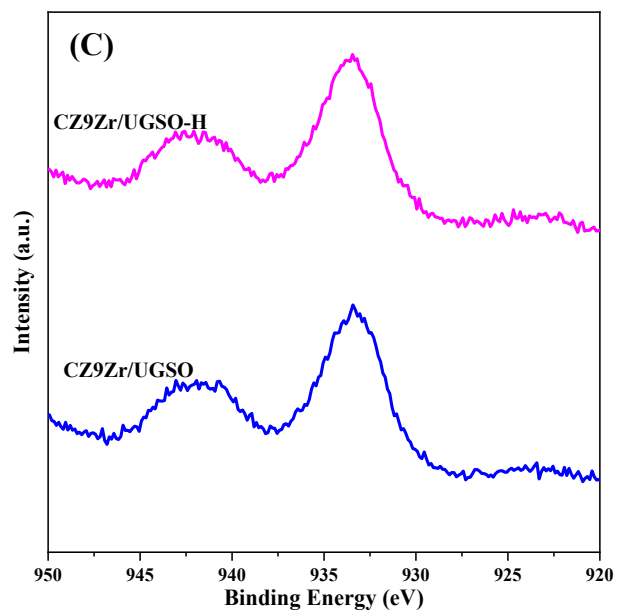

**Figure S5.** XPS spectra of surface elements in calcined samples (A) Mg 2p, (b) Fe 2p, (C) Cu 2p.
